# Supplementary material for: Singlet oxygen makes plant epidermis thicker with less stomata
Source: Research Square preprint supplement (doi:10.21203/rs.3.rs-2365678/v1), 2022-12-12
Supplement: Supplementary file 1 [file 577204b6fa74621ba0ffeb0d.xlsx]

## Sheet: Gene expression
gene_id	gene_name	GO_id	GO_term	flu/abi4	flu	Col (WT)	flu/ex1/ex2	flu:WT	flu/abi4:WT	flu/ex1/ex2:WT
AT5G22940	F8H	GO:0071555;GO:0005794; GO:0016021; GO:0016020; GO:0000139; GO:0016740; GO:0016757;	BP:cell wall organization;CC:Golgi apparatus;CC:integral component of membrane;CC:membrane;CC:Golgi membrane;MF:transferase activity;MF:transferase activity, transferring glycosyl groups;	0.280333	1.39	0.144333	0.198	9.63048	1.94226	1.37182
AT2G47780		GO:0080186; GO:0034389; GO:0045927; GO:1902584; GO:0005811;	BP:developmental vegetative growth;BP:lipid particle organization;BP:positive regulation of growth;BP:positive regulation of response to water deprivation;CC:lipid particle;	0.858667	6.432	1.05033	1.17933	6.12377	0.817518	1.12282
AT1G62440	LRX2	GO:0071555; GO:0007275;GO:0005618; GO:0005576;	BP:cell wall organization;BP:multicellular organism development;CC:cell wall;CC:extracellular region;	0.740667	2.87633	0.499	0.694	5.7642	1.4843	1.39078
AT5G15530	BCCP2	GO:0006633; GO:0006631; GO:0006629; GO:0009941; GO:0009536; GO:0009570; GO:0009317; GO:0009507; GO:0003989;	BP:fatty acid biosynthetic process;BP:fatty acid metabolic process;BP:lipid metabolic process;CC:chloroplast envelope;CC:plastid;CC:chloroplast stroma;CC:acetyl-CoA carboxylase complex;CC:chloroplast;MF:acetyl-CoA carboxylase activity;	2.15833	6.39667	1.20967	0.952333	5.28796	1.78424	0.787269
AT3G43960	RDL3	GO:0051603; GO:0048767; GO:0006508; GO:0005615; GO:0005764; GO:0031225; GO:0016787; GO:0004197; GO:0008233; GO:0008234;	BP:proteolysis involved in cellular protein catabolic process;BP:root hair elongation;BP:proteolysis;CC:extracellular space;CC:lysosome;CC:anchored component of membrane;MF:hydrolase activity;MF:cysteine-type endopeptidase activity;MF:peptidase activity;MF:cysteine-type peptidase activity;	0.484333	1.80067	0.347	0.193667	5.18924	1.39577	0.558117
AT5G07030		GO:0030163; GO:0006508; GO:0005618; GO:0009505;GO:0016787; GO:0004190; GO:0008233;	BP:protein catabolic process;BP:proteolysis;CC:cell wall;CC:plant-type cell wall;MF:hydrolase activity;MF:aspartic-type endopeptidase activity;MF:peptidase activity;	0.918	2.95067	0.568667	0.595333	5.18875	1.6143	1.04689
AT5G50335		GO:0008150;	BP:biological_process;	6.00167	30.1137	6.07167	4.933	4.9597	0.988471	0.812462
AT4G30180	BHLH146	GO:0006355; GO:0006351; GO:0005634;GO:0003700; GO:0003677; GO:0046983;	BP:regulation of transcription, DNA-templated;BP:transcription, DNA-templated;CC:nucleus;MF:transcription factor activity, sequence-specific DNA binding;MF:DNA binding;MF:protein dimerization activity;	1.19167	7.12433	1.44333	0.303	4.93603	0.825635	0.209931
AT5G21960	ERF016	GO:0009873; GO:0006355; GO:0006351; GO:0005634;GO:0003700; GO:0003677;	BP:ethylene-activated signaling pathway;BP:regulation of transcription, DNA-templated;BP:transcription, DNA-templated;CC:nucleus;MF:transcription factor activity, sequence-specific DNA binding;MF:DNA binding;	0.585667	6.045	1.257	1.46667	4.80907	0.465924	1.1668
AT3G53190		GO:0045490; GO:0016021; GO:0016020; GO:0031225;GO:0030570; GO:0046872; GO:0016829;	BP:pectin catabolic process;CC:integral component of membrane;CC:membrane;CC:anchored component of membrane;MF:pectate lyase activity;MF:metal ion binding;MF:lyase activity;	0.505667	1.42033	0.310667	0.402333	4.57189	1.62768	1.29506
AT3G27690	LHCB2.4	GO:0009409; GO:0009416; GO:0015979; GO:0030104; GO:0009637; GO:0010218; GO:1903428; GO:0071215; GO:0018298; GO:0009768; GO:0009769; GO:0090333; GO:0009269; GO:0010114; GO:0009645; GO:0009644; GO:0009765; GO:0009517; GO:0009579; GO:0009941; GO:0009536; GO:0016021; GO:0016020; GO:0009535; GO:0010287; GO:0009507; GO:0009522; GO:0009523; GO:0046872; GO:0016168; GO:0031409; GO:0005515;	BP:response to cold;BP:response to light stimulus;BP:photosynthesis;BP:water homeostasis;BP:response to blue light;BP:response to far red light;BP:positive regulation of reactive oxygen species biosynthetic process;BP:cellular response to abscisic acid stimulus;BP:protein-chromophore linkage;BP:photosynthesis, light harvesting in photosystem I;BP:photosynthesis, light harvesting in photosystem II…	432.159	1038.58	230.514	342.696	4.50551	1.87476	1.48666
AT5G05960		GO:0009627	BP:systemic acquired resistance;CC:extracellular region;	2.16733	7.95967	1.87067	2.62967	4.25499	1.15859	1.40574
AT4G24275		GO:0009414;	BP:response to water deprivation;	3.84733	9.00167	2.177	2.10867	4.1349	1.76726	0.968611
AT2G21140	PRP2	GO:0009664;GO:0005618; GO:0005576;	BP:plant-type cell wall organization;CC:cell wall;CC:extracellular region;	2.57867	5.36467	1.34933	0.931	3.97579	1.91107	0.68997
AT5G48920	TED7	GO:0016021; GO:0016020; GO:0003674;	CC:integral component of membrane;CC:membrane;MF:molecular_function;	0.925333	4.233	1.06767	0.508333	3.96472	0.866687	0.476116
AT4G02200		GO:0005634;	CC:nucleus;	11.6093	24.2843	6.158	11.8023	3.94354	1.88524	1.91659
AT5G03260	LAC11	GO:0046274; GO:0055114; GO:0048046; GO:0005576;GO:0016722; GO:0052716; GO:0046872; GO:0005507; GO:0016491;	BP:lignin catabolic process;BP:oxidation-reduction process;CC:apoplast;CC:extracellular region;MF:oxidoreductase activity, oxidizing metal ions;MF:hydroquinon;MF:metal ion binding;MF:copper ion binding;MF:oxidoreductase activity;	1.27167	5.60733	1.448	0.495333	3.87247	0.878223	0.342081
AT2G37640	EXPA3	GO:0009664; GO:0009739; GO:0071555; GO:0006949; GO:0010114; GO:0005618; GO:0016020; GO:0005576;	BP:plant-type cell wall organization;BP:response to gibberellin;BP:cell wall organization;BP:syncytium formation;BP:response to red light;CC:cell wall;CC:membrane;CC:extracellular region;	7.08633	18.8983	4.95967	3.68967	3.8104	1.42879	0.743934
AT2G16850	PIP2-8	GO:0006810; GO:0009737; GO:0034220; GO:0006833; GO:0005887; GO:0016021; GO:0016020; GO:0005886; GO:0015250; GO:0005215; GO:0005515;	BP:transport;BP:response to abscisic acid;BP:ion transmembrane transport;BP:water transport;CC:integral component of plasma membrane;CC:integral component of membrane;CC:membrane;CC:plasma membrane;MF:water channel activity;MF:transporter activity;MF:protein binding;	0.814667	2.744	0.720333	0.968	3.80935	1.13096	1.34382
AT1G80080	TMM	GO:0009737; GO:0008356; GO:0016021; GO:0016020; GO:0005886; GO:0031225; GO:0004872; GO:0005515; GO:0042277;	BP:response to abscisic acid;BP:asymmetric cell division;CC:integral component of membrane;CC:membrane;CC:plasma membrane;CC:anchored component of membrane;MF:receptor activity;MF:protein binding;MF:peptide binding;	0.754	1.66767	0.441667	0.395333	3.77585	1.70717	0.895094
AT1G70710	CEL1	GO:0042547; GO:0005975; GO:0071555; GO:0030245; GO:0000272; GO:0008152; GO:0005576; GO:0009507;GO:0016787; GO:0008810; GO:0016798; GO:0003824; GO:0004553;	BP:cell wall modification involved in multidimensional cell growth;BP:carbohydrate metabolic process;BP:cell wall organization;BP:cellulose catabolic process;BP:polysaccharide catabolic process;BP:metabolic process;CC:extracellular region;CC:chloroplast;MF:hydrolase activity;MF:cellulase activity;MF:hydrolase activity, acting on glycosyl bonds;MF:catalytic activity;MF:hydrolase activity, hydrolyz…	2.14367	5.076	1.368	1.14	3.71053	1.56701	0.833333
AT5G16250		GO:0008150;GO:0016021; GO:0016020;	BP:biological_process;CC:integral component of membrane;CC:membrane;	3.01567	6.317	1.706	2.428	3.70281	1.76768	1.42321
AT1G23965		GO:0008150;GO:0046983;	BP:biological_process;MF:protein dimerization activity;	0.859333	2.604	0.705667	0.676333	3.69013	1.21776	0.958432
AT3G10340	PAL4	GO:0006559; GO:0009800; GO:0009698;GO:0005737; GO:0016841; GO:0016829; GO:0003824; GO:0045548; GO:0005515;	BP:L-phenylalanine catabolic process;BP:cinnamic acid biosynthetic process;BP:phenylpropanoid metabolic process;CC:cytoplasm;MF:ammonia-lyase activity;MF:lyase activity;MF:catalytic activity;MF:phenylalanine ammonia-lyase activity;MF:protein binding;	1.15867	3.03667	0.826	1.58833	3.67635	1.40274	1.92292
AT2G26530	AR781	GO:0008150; GO:0005886;	BP:biological_process;CC:plasma membrane;	63.2777	115.164	31.973	62.0373	3.60191	1.9791	1.9403
AT4G35350	XCP1	GO:0051603; GO:0010623; GO:0006508; GO:0000325; GO:0005615; GO:0005773; GO:0005634; GO:0016020; GO:0005764; GO:0005886; GO:0016787; GO:0004197; GO:0008233; GO:0008234;	BP:proteolysis involved in cellular protein catabolic process;BP:programmed cell death involved in cell development;BP:proteolysis;CC:plant-type vacuole;CC:extracellular space;CC:vacuole;CC:nucleus;CC:membrane;CC:lysosome;CC:plasma membrane;MF:hydrolase activity;MF:cysteine-type endopeptidase activity;MF:peptidase activity;MF:cysteine-type peptidase activity;	4.717	23.6777	6.628	2.56033	3.57237	0.711678	0.38629
AT3G25900	HMT-1	GO:0008652; GO:0032259; GO:0009086;GO:0005737; GO:0008898; GO:0046872; GO:0016740; GO:0008270; GO:0008168; GO:0047150;	BP:cellular amino acid biosynthetic process;BP:methylation;BP:methionine biosynthetic process;CC:cytoplasm;MF:S-adenosylmethionine-homocysteine S-methyltransferase activity;MF:metal ion binding;MF:transferase activity;MF:zinc ion binding;MF:methyltransferase activity;MF:betaine-homocysteine S-methyltransferase activity;	0.915667	3.198	0.897	1.703	3.56522	1.02081	1.89855
AT1G28290	AGP31	GO:0009753; GO:0005618; GO:0005576; GO:0005886; GO:0009505; GO:0009506;	BP:response to jasmonic acid;CC:cell wall;CC:extracellular region;CC:plasma membrane;CC:plant-type cell wall;CC:plasmodesma;	2.02667	4.20933	1.187	1.77967	3.54619	1.70739	1.4993
AT1G26945	PRE6	GO:0040008; GO:0006355; GO:0009416; GO:0006351;GO:0005737; GO:0005634; GO:0046983;	BP:regulation of growth;BP:regulation of transcription, DNA-templated;BP:response to light stimulus;BP:transcription, DNA-templated;CC:cytoplasm;CC:nucleus;MF:protein dimerization activity;	4.72733	11.6103	3.28367	3.867	3.53578	1.43965	1.17765
AT3G51470		GO:0006470;GO:0016787; GO:0043169; GO:0004722; GO:0004721; GO:0003824; GO:0046872;	BP:protein dephosphorylation;MF:hydrolase activity;MF:cation binding;MF:protein serine/threonine phosphatase activity;MF:phosphoprotein phosphatase activity;MF:catalytic activity;MF:metal ion binding;	0.897	1.753	0.503	0.965667	3.48509	1.7833	1.91981
AT4G32460		GO:0009505;	CC:plant-type cell wall;	8.781	19.1617	5.52467	5.52667	3.46838	1.58942	1.00036
AT1G68780		GO:0007165	BP:signal transduction;CC:plasma membrane;CC:mitochondrion;	2.184	3.89867	1.137	1.41267	3.42891	1.92084	1.24245
AT1G74070	CYP26-2	GO:0000413; GO:0006457;GO:0009579; GO:0009534; GO:0009536; GO:0009507; GO:0016853; GO:0003755;	BP:protein peptidyl-prolyl isomerization;BP:protein folding;CC:thylakoid;CC:chloroplast thylakoid;CC:plastid;CC:chloroplast;MF:isomerase activity;MF:peptidyl-prolyl cis-trans isomerase activity;	6.12833	12.428	3.68167	4.513	3.37565	1.66455	1.2258
AT1G64150	PAM71	GO:0071421; GO:0010270; GO:0006816; GO:1903830; GO:0006828;GO:0009535; GO:0009536; GO:0016021; GO:0016020; GO:0031969; GO:0009579; GO:0009507; GO:0005384; GO:0015095;	BP:manganese ion transmembrane transport;BP:photosystem II oxygen evolving complex assembly;BP:calcium ion transport;BP:magnesium ion transmembrane transport;BP:manganese ion transport;CC:chloroplast thylakoid membrane;CC:plastid;CC:integral component of membrane;CC:membrane;CC:chloroplast membrane;CC:thylakoid;CC:chloroplast;MF:manganese ion transmembrane transporter activity;MF:magnesium ion tr…	5.88067	10.4503	3.10033	4.71467	3.37071	1.89679	1.5207
AT1G02730	CSLD5	GO:0042546; GO:0000919; GO:0097502; GO:0048367; GO:0071555; GO:0006970; GO:0009414; GO:0009651; GO:0030244; GO:0071669;GO:0005794; GO:0016021; GO:0016020; GO:0000139; GO:0016757; GO:0051753; GO:0016740; GO:0016760; GO:0046527;	BP:cell wall biogenesis;BP:cell plate assembly;BP:mannosylation;BP:shoot system development;BP:cell wall organization;BP:response to osmotic stress;BP:response to water deprivation;BP:response to salt stress;BP:cellulose biosynthetic process;BP:plant-type cell wall organization or biogenesis;CC:Golgi apparatus;CC:integral component of membrane;CC:membrane;CC:Golgi membrane;MF:transferase activity…	0.424	0.839	0.249667	0.387667	3.36048	1.69826	1.55274
AT3G62030	ROC4	GO:0006457; GO:0007165; GO:0009651; GO:0000413; GO:0009737; GO:0009735; GO:0009642; GO:0006979; GO:0010555; GO:0019344; GO:0042742; GO:0031977; GO:0048046; GO:0009579; GO:0009941; GO:0009536; GO:0009570; GO:0022626; GO:0009535; GO:0009507; GO:0003755; GO:0016853; GO:0005515;	BP:protein folding;BP:signal transduction;BP:response to salt stress;BP:protein peptidyl-prolyl isomerization;BP:response to abscisic acid;BP:response to cytokinin;BP:response to light intensity;BP:response to oxidative stress;BP:response to mannitol;BP:cysteine biosynthetic process;BP:defense response to bacterium;CC:thylakoid lumen;CC:apoplast;CC:thylakoid;CC:chloroplast envelope;CC:plastid;CC:…	97.8967	179.062	53.4463	104.544	3.35032	1.83168	1.95605
AT5G51890	PER66	GO:0009664; GO:0098869; GO:0042744; GO:0055114; GO:0006979; GO:0009505; GO:0005576; GO:0009506; GO:0020037; GO:0046872; GO:0004601; GO:0016491;	BP:plant-type cell wall organization;BP:cellular oxidant detoxification;BP:hydrogen peroxide catabolic process;BP:oxidation-reduction process;BP:response to oxidative stress;CC:plant-type cell wall;CC:extracellular region;CC:plasmodesma;MF:heme binding;MF:metal ion binding;MF:peroxidase activity;MF:oxidoreductase activity;	8.42867	20.169	6.041	4.43167	3.33869	1.39524	0.733598
AT5G67210	IRX15-L	GO:0009834; GO:0045492;GO:0005794; GO:0016021; GO:0016020; GO:0000139; GO:0003674;	BP:plant-type secondary cell wall biogenesis;BP:xylan biosynthetic process;CC:Golgi apparatus;CC:integral component of membrane;CC:membrane;CC:Golgi membrane;MF:molecular_function;	0.864333	5.77433	1.731	3.002	3.33584	0.499326	1.73426
AT1G53520	FAP3	GO:0006631; GO:0009813; GO:0009536; GO:0009570; GO:0009507; GO:0045430; GO:0005504; GO:0016872;	BP:fatty acid metabolic process;BP:flavonoid biosynthetic process;CC:plastid;CC:chloroplast stroma;CC:chloroplast;MF:chalcone isomerase activity;MF:fatty acid binding;MF:intramolecular lyase activity;	8.93433	21.8727	6.65	4.46933	3.28912	1.34351	0.67208
AT4G31840	ENODL15	GO:0016021; GO:0016020; GO:0046658; GO:0005886; GO:0031225; GO:0009055;	CC:integral component of membrane;CC:membrane;CC:anchored component of plasma membrane;CC:plasma membrane;CC:anchored component of membrane;MF:electron carrier activity;	1.49533	3.356	1.02133	1.433	3.2859	1.4641	1.40307
AT3G56160	BASS4	GO:0006810;GO:0009941; GO:0009536; GO:0016021; GO:0016020; GO:0009507;	BP:transport;CC:chloroplast envelope;CC:plastid;CC:integral component of membrane;CC:membrane;CC:chloroplast;	4.32267	7.75133	2.381	4.39333	3.25549	1.81548	1.84516
AT2G04780	FLA7	GO:0046658; GO:0016020; GO:0005886; GO:0031225;	CC:anchored component of plasma membrane;CC:membrane;CC:plasma membrane;CC:anchored component of membrane;	4.98833	16.6303	5.11033	2.53933	3.25426	0.976127	0.496902
AT5G27450	MVK	GO:0016126; GO:0016125; GO:0006629; GO:0016310; GO:0008299; GO:0006694; GO:0019287; GO:0008202; GO:0005737; GO:0005829; GO:0016301; GO:0016740; GO:0005524; GO:0004496; GO:0000166;	BP:sterol biosynthetic process;BP:sterol metabolic process;BP:lipid metabolic process;BP:phosphorylation;BP:isoprenoid biosynthetic process;BP:steroid biosynthetic process;BP:isopentenyl diphosphate biosynthetic process, mevalonate pathway;BP:steroid metabolic process;CC:cytoplasm;CC:cytosol;MF:kinase activity;MF:transferase activity;MF:ATP binding;MF:mevalonate kinase activity;MF:nucleotide bind…	1.98533	4.74733	1.46567	2.14167	3.23903	1.35456	1.46122
AT5G22460		GO:0005773; GO:0005618; GO:0009505; GO:0009506; GO:0016787;	CC:vacuole;CC:cell wall;CC:plant-type cell wall;CC:plasmodesma;MF:hydrolase activity;	1.928	6.68433	2.06567	1.331	3.23592	0.933355	0.644344
AT3G01500	BCA1	GO:2000122; GO:0009817; GO:0015976; GO:0010119; GO:0042742; GO:0009409; GO:0010037; GO:0015979;GO:0009579; GO:0009941; GO:0009535; GO:0010319; GO:0016020; GO:0048046; GO:0009536; GO:0005886; GO:0009570; GO:0009507; GO:0016829; GO:0008270; GO:0004089;	BP:negative regulation of stomatal complex development;BP:defense response to fungus, incompatible interaction;BP:carbon utilization;BP:regulation of stomatal movement;BP:defense response to bacterium;BP:response to cold;BP:response to carbon dioxide;BP:photosynthesis;CC:thylakoid;CC:chloroplast envelope;CC:chloroplast thylakoid membrane;CC:stromule;CC:membrane;CC:apoplast;CC:plastid;CC:plasma me…	754.157	1247.2	387.648	398.933	3.21736	1.94547	1.02911
AT3G53750	ACT1	GO:0048767; GO:0048589; GO:0007010;GO:0005856; GO:0005737; GO:0005618; GO:0005829; GO:0048046; GO:0005886; GO:0005634; GO:0009506; GO:0005200; GO:0000166; GO:0005524;	BP:root hair elongation;BP:developmental growth;BP:cytoskeleton organization;CC:cytoskeleton;CC:cytoplasm;CC:cell wall;CC:cytosol;CC:apoplast;CC:plasma membrane;CC:nucleus;CC:plasmodesma;MF:structural constituent of cytoskeleton;MF:nucleotide binding;MF:ATP binding;	1.988	5.58033	1.77467	2.419	3.14444	1.12021	1.36307
AT2G27402		GO:0008150;GO:0005575; GO:0003674;	BP:biological_process;CC:cellular_component;MF:molecular_function;	6.12033	10.9153	3.47433	1.71067	3.14171	1.76158	0.492373
AT2G29300		GO:0055114; GO:0016491;	BP:oxidation-reduction process;MF:oxidoreductase activity;	3.76967	8.361	2.66733	2.83967	3.13459	1.41327	1.06461
AT3G20350		GO:0005886;	CC:plasma membrane;	0.967	1.716	0.548333	0.560333	3.12948	1.76353	1.02188
AT2G46810	BHLH70	GO:0006355; GO:0006351; GO:0005634;GO:0003700; GO:0003677; GO:0046983;	BP:regulation of transcription, DNA-templated;BP:transcription, DNA-templated;CC:nucleus;MF:transcription factor activity, sequence-specific DNA binding;MF:DNA binding;MF:protein dimerization activity;	2.71133	7.118	2.304	2.621	3.08941	1.17679	1.13759
AT5G15230	GASA4	GO:0045454; GO:0009739; GO:0009740; GO:0005576; GO:0005623;	BP:cell redox homeostasis;BP:response to gibberellin;BP:gibberellic acid mediated signaling pathway;CC:extracellular region;CC:cell;	67.7463	164.204	53.2597	23.276	3.08308	1.272	0.437029
AT5G10830		GO:0008152; GO:0032259;GO:0005737; GO:0008757; GO:0016740; GO:0008168;	BP:metabolic process;BP:methylation;CC:cytoplasm;MF:S-adenosylmethionine-dependent methyltransferase activity;MF:transferase activity;MF:methyltransferase activity;	3.13333	5.49267	1.78567	1.42067	3.07598	1.75471	0.795595
AT5G38410		GO:0015977; GO:0015979; GO:0009637; GO:0010218; GO:0019253; GO:0010114; GO:0055114; GO:0009853; GO:0080158; GO:0022626; GO:0048046; GO:0009579; GO:0009941; GO:0009536; GO:0005618; GO:0009570; GO:0016020; GO:0009507;GO:0004497; GO:0016491; GO:0016829; GO:0019904; GO:0016984;	BP:carbon fixation;BP:photosynthesis;BP:response to blue light;BP:response to far red light;BP:reductive pentose-phosphate cycle;BP:response to red light;BP:oxidation-reduction process;BP:photorespiration;BP:chloroplast ribulose bisphosphate carboxylase complex biogenesis;CC:cytosolic ribosome;CC:apoplast;CC:thylakoid;CC:chloroplast envelope;CC:plastid;CC:cell wall;CC:chloroplast stroma;CC:membra…	3116.09	5419.24	1770.55	1777.77	3.06076	1.75995	1.00408
AT1G28390		GO:0006468; GO:0016310; GO:0007166; GO:0007178; GO:0005886; GO:0016301; GO:0004672; GO:0000166; GO:0004675; GO:0004674; GO:0016740; GO:0005524;	BP:protein phosphorylation;BP:phosphorylation;BP:cell surface receptor signaling pathway;BP:transmembrane receptor protein serine/threonine kinase signaling pathway;CC:plasma membrane;MF:kinase activity;MF:protein kinase activity;MF:nucleotide binding;MF:transmembrane receptor protein serine/threonine kinase activity;MF:protein serine/threonine kinase activity;MF:transferase activity;MF:ATP bindi…	1.10233	2.791	0.913	1.22467	3.05696	1.20737	1.34137
AT4G29610	CDA6	GO:0009972; GO:0005829;GO:0016787; GO:0046872; GO:0004126; GO:0003824; GO:0008270;	BP:cytidine deamination;CC:cytosol;MF:hydrolase activity;MF:metal ion binding;MF:cytidine deaminase activity;MF:catalytic activity;MF:zinc ion binding;	11.1623	20.0773	6.59667	9.74333	3.04356	1.69212	1.47701
AT3G53900	UPP	GO:0032502; GO:0043097; GO:0006206; GO:0044206; GO:0016036; GO:0009116; GO:0008152; GO:0006223; GO:0009570; GO:0009536; GO:0005829; GO:0009507; GO:0016757; GO:0005525; GO:0000166; GO:0003824; GO:0004849; GO:0016740; GO:0004845;	BP:developmental process;BP:pyrimidine nucleoside salvage;BP:pyrimidine nucleobase metabolic process;BP:UMP salvage;BP:cellular response to phosphate starvation;BP:nucleoside metabolic process;BP:metabolic process;BP:uracil salvage;CC:chloroplast stroma;CC:plastid;CC:cytosol;CC:chloroplast;MF:transferase activity, transferring glycosyl groups;MF:GTP binding;MF:nucleotide binding;MF:catalytic acti…	3.34	6.65233	2.18633	2.949	3.04269	1.52767	1.34883
AT3G25920	RPL15	GO:0009735; GO:0006412;GO:0009941; GO:0009536; GO:0015934; GO:0005840; GO:0009570; GO:0000311; GO:0030529; GO:0005622; GO:0009507; GO:0003735;	BP:response to cytokinin;BP:translation;CC:chloroplast envelope;CC:plastid;CC:large ribosomal subunit;CC:ribosome;CC:chloroplast stroma;CC:plastid large ribosomal subunit;CC:intracellular ribonucleoprotein complex;CC:intracellular;CC:chloroplast;MF:structural constituent of ribosome;	184.371	297.549	97.8583	145.297	3.04061	1.88406	1.48477
AT1G04820	TUBA4	GO:0007017; GO:0007010;GO:0005856; GO:0005737; GO:0005874; GO:0003924; GO:0000166; GO:0005200; GO:0005525;	BP:microtubule-based process;BP:cytoskeleton organization;CC:cytoskeleton;CC:cytoplasm;CC:microtubule;MF:GTPase activity;MF:nucleotide binding;MF:structural constituent of cytoskeleton;MF:GTP binding;	23.7467	41.2093	13.657	19.8707	3.01745	1.73879	1.45498
AT3G07540	FH10	GO:0016021; GO:0016020; GO:0005886;GO:0003779;	CC:integral component of membrane;CC:membrane;CC:plasma membrane;MF:actin binding;	0.934667	2.55133	0.846	0.924333	3.01576	1.10481	1.09259
AT1G55330	AGP21	GO:0008150;GO:0016021; GO:0016020; GO:0005886; GO:0031225;	BP:biological_process;CC:integral component of membrane;CC:membrane;CC:plasma membrane;CC:anchored component of membrane;	37.9837	85.9823	28.5253	25.019	3.01424	1.33158	0.87708
AT5G25475		GO:0006355; GO:0006351;GO:0005634; GO:0016020; GO:0016021; GO:0003677;	BP:regulation of transcription, DNA-templated;BP:transcription, DNA-templated;CC:nucleus;CC:membrane;CC:integral component of membrane;MF:DNA binding;	3.096	7.29533	2.423	2.80233	3.01087	1.27775	1.15656
AT1G33811		GO:0006629; GO:0016042; GO:0005576;GO:0016787; GO:0016788;	BP:lipid metabolic process;BP:lipid catabolic process;CC:extracellular region;MF:hydrolase activity;MF:hydrolase activity, acting on ester bonds;	11.1523	19.1293	6.374	3.21367	3.00115	1.74966	0.504184
AT3G21550	DMP2	GO:0010256;GO:0016021; GO:0016020; GO:0005783; GO:0009705;	BP:endomembrane system organization;CC:integral component of membrane;CC:membrane;CC:endoplasmic reticulum;CC:plant-type vacuole membrane;	3.72033	14.4847	4.83067	1.68367	2.99848	0.770149	0.348537
AT4G11100		GO:0008150;GO:0005575;	BP:biological_process;CC:cellular_component;	6.34333	9.74333	3.25367	5.573	2.99457	1.9496	1.71284
AT3G54260	TBL36	GO:0071554; GO:0005794; GO:0016021; GO:0016020; GO:0016413;	BP:cell wall organization or biogenesis;CC:Golgi apparatus;CC:integral component of membrane;CC:membrane;MF:O-acetyltransferase activity;	1.114	2.835	0.948	0.917667	2.99051	1.17511	0.968003
AT1G26820	RNS3	GO:0090502; GO:0090305;GO:0033897; GO:0016787; GO:0004518; GO:0004519; GO:0003723;	BP:RNA phosphodiester bond hydrolysis, endonucleolytic;BP:nucleic acid phosphodiester bond hydrolysis;MF:ribonuclease T2 activity;MF:hydrolase activity;MF:nuclease activity;MF:endonuclease activity;MF:RNA binding;	0.801667	4.176	1.39667	0.404333	2.98998	0.573986	0.289499
AT5G46690	BHLH71	GO:0006355; GO:0006351; GO:0007275; GO:0005634;GO:0003700; GO:0003677; GO:0046983;	BP:regulation of transcription, DNA-templated;BP:transcription, DNA-templated;BP:multicellular organism development;CC:nucleus;MF:transcription factor activity, sequence-specific DNA binding;MF:DNA binding;MF:protein dimerization activity;	1.41433	3.661	1.22867	1.2	2.97965	1.15111	0.976668
AT2G39180	CCR2	GO:0006468; GO:0016310; GO:0016020; GO:0016021; GO:0016301; GO:0000166; GO:0004674; GO:0016740; GO:0004672; GO:0005524; GO:0042803;	BP:protein phosphorylation;BP:phosphorylation;CC:membrane;CC:integral component of membrane;MF:kinase activity;MF:nucleotide binding;MF:protein serine/threonine kinase activity;MF:transferase activity;MF:protein kinase activity;MF:ATP binding;MF:protein homodimerization activity;	0.406333	1.51533	0.508667	0.459	2.97903	0.79882	0.902359
AT2G33050	AtRLP26	GO:0000004; GO:0007582	BP:biological_process;CC:guard cell;	2.50167	4.26133	1.43233	2.12867	2.9751	1.74657	1.48615
AT5G15580	LNG1	GO:0051513; GO:0005829; GO:0005634; GO:0005515;	BP:regulation of monopolar cell growth;CC:cytosol;CC:nucleus;MF:protein binding;	2.25267	3.69633	1.24433	1.47767	2.97053	1.81034	1.18752
AT2G29050	RBL1	GO:0006508;GO:0005794; GO:0016021; GO:0016020; GO:0000139; GO:0004252; GO:0016787; GO:0008233;	BP:proteolysis;CC:Golgi apparatus;CC:integral component of membrane;CC:membrane;CC:Golgi membrane;MF:serine-type endopeptidase activity;MF:hydrolase activity;MF:peptidase activity;	1.57933	2.549	0.861333	1.083	2.95937	1.83359	1.25735
AT5G58260	ndhN	GO:0010258; GO:0006810; GO:0009817; GO:0055114;GO:0009535; GO:0009941; GO:0009536; GO:0010598; GO:0009579; GO:0016020; GO:0009507; GO:0016655; GO:0016491; GO:0048038;	BP:NADH dehydrogenase comple;BP:transport;BP:defense response to fungus, incompatible interaction;BP:oxidation-reduction process;CC:chloroplast thylakoid membrane;CC:chloroplast envelope;CC:plastid;CC:NA;CC:thylakoid;CC:membrane;CC:chloroplast;MF:oxidoreductase activity, acting on NA;MF:oxidoreductase activity;MF:quinone binding;	8.51167	13.72	4.64333	7.122	2.95477	1.83309	1.53381
AT4G39900		GO:0008150;GO:0016021; GO:0016020;	BP:biological_process;CC:integral component of membrane;CC:membrane;	9.85367	16.18	5.51767	7.891	2.9324	1.78584	1.43013
AT5G66080		GO:0006470;GO:0016787; GO:0043169; GO:0004722; GO:0004721; GO:0003824; GO:0046872;	BP:protein dephosphorylation;MF:hydrolase activity;MF:cation binding;MF:protein serine/threonine phosphatase activity;MF:phosphoprotein phosphatase activity;MF:catalytic activity;MF:metal ion binding;	1.62733	2.70033	0.921667	1.28867	2.92984	1.76564	1.39819
AT4G37110		GO:0005634;	CC:nucleus;	1.35433	2.48533	0.851667	0.908	2.9182	1.59022	1.06614
AT3G19820	DIM	GO:0009826; GO:0009834; GO:0016132; GO:0009808; GO:0055114; GO:0016020; GO:0043231; GO:0005773; GO:0016021; GO:0005774; GO:0005886; GO:0005783; GO:0031090; GO:0050614; GO:0003824; GO:0050660; GO:0005516; GO:0016614; GO:0016491;	BP:unidimensional cell growth;BP:plant-type secondary cell wall biogenesis;BP:brassinosteroid biosynthetic process;BP:lignin metabolic process;BP:oxidation-reduction process;CC:membrane;CC:intracellular membrane-bounded organelle;CC:vacuole;CC:integral component of membrane;CC:vacuolar membrane;CC:plasma membrane;CC:endoplasmic reticulum;CC:organelle membrane;MF:delta24-sterol reductase activity;…	58.3587	99.71	34.4607	23.097	2.89344	1.69349	0.670242
AT4G20870	FAH2	GO:0006633; GO:0006631; GO:0006629; GO:0008610; GO:0055114; GO:0016021; GO:0016020; GO:0005789; GO:0005783; GO:0016491; GO:0005515; GO:0005506;	BP:fatty acid biosynthetic process;BP:fatty acid metabolic process;BP:lipid metabolic process;BP:lipid biosynthetic process;BP:oxidation-reduction process;CC:integral component of membrane;CC:membrane;CC:endoplasmic reticulum membrane;CC:endoplasmic reticulum;MF:oxidoreductase activity;MF:protein binding;MF:iron ion binding;	23.467	39.5387	13.665	16.11	2.89343	1.71731	1.17892
AT2G22170	PLAT2	GO:0009579; GO:0016020; GO:0005783; GO:0009507;	CC:thylakoid;CC:membrane;CC:endoplasmic reticulum;CC:chloroplast;	8.73433	20.2193	7.00733	6.329	2.88545	1.24646	0.903197
AT1G04520	CRRSP3	GO:0010497; GO:0006810; GO:0016032; GO:0046739;GO:0016020; GO:0016021; GO:0009506; GO:0030054;	BP:plasmodesmata-mediated intercellular transport;BP:transport;BP:viral process;BP:transport of virus in multicellular host;CC:membrane;CC:integral component of membrane;CC:plasmodesma;CC:cell junction;	1.94033	3.58767	1.249	1.70367	2.87243	1.55351	1.36402
AT1G69700	HVA22C	GO:0009737; GO:0009414; GO:0042538; GO:0016021; GO:0016020; GO:0009506;	BP:response to abscisic acid;BP:response to water deprivation;BP:hyperosmotic salinity response;CC:integral component of membrane;CC:membrane;CC:plasmodesma;	6.80433	10.376	3.63233	3.098	2.85657	1.87327	0.852895
AT1G48480	RKL1	GO:0006468; GO:0016310;GO:0016020; GO:0016021; GO:0005774; GO:0005886; GO:0009506; GO:0016301; GO:0004672; GO:0005524; GO:0000166;	BP:protein phosphorylation;BP:phosphorylation;CC:membrane;CC:integral component of membrane;CC:vacuolar membrane;CC:plasma membrane;CC:plasmodesma;MF:kinase activity;MF:protein kinase activity;MF:ATP binding;MF:nucleotide binding;	6.712	10.8243	3.80867	4.411	2.84203	1.7623	1.15815
AT5G62700	TUBB3	GO:0007010; GO:0007017;GO:0005856; GO:0005737; GO:0005874; GO:0005200; GO:0003924; GO:0000166; GO:0005515; GO:0005525;	BP:cytoskeleton organization;BP:microtubule-based process;CC:cytoskeleton;CC:cytoplasm;CC:microtubule;MF:structural constituent of cytoskeleton;MF:GTPase activity;MF:nucleotide binding;MF:protein binding;MF:GTP binding;	62.2357	99.7183	35.106	42.0303	2.84049	1.77279	1.19724
AT3G28180	CSLC4	GO:0071555;GO:0005794; GO:0016020; GO:0016021; GO:0005802; GO:0000139; GO:0005886; GO:0005768; GO:0016757; GO:0016740; GO:0005515; GO:0042803;	BP:cell wall organization;CC:Golgi apparatus;CC:membrane;CC:integral component of membrane;CC:trans-Golgi network;CC:Golgi membrane;CC:plasma membrane;CC:endosome;MF:transferase activity, transferring glycosyl groups;MF:transferase activity;MF:protein binding;MF:protein homodimerization activity;	17.6603	32.038	11.2993	15.5437	2.83539	1.56295	1.37563
AT3G61870		GO:0008150;GO:0009941; GO:0009534; GO:0016021; GO:0016020; GO:0009706; GO:0009507;	BP:biological_process;CC:chloroplast envelope;CC:chloroplast thylakoid;CC:integral component of membrane;CC:membrane;CC:chloroplast inner membrane;CC:chloroplast;	50.3877	83.2523	29.4143	49.4617	2.83033	1.71303	1.68155
AT4G12730	FLA2	GO:0046658; GO:0016020; GO:0005774; GO:0005886; GO:0031225;	CC:anchored component of plasma membrane;CC:membrane;CC:vacuolar membrane;CC:plasma membrane;CC:anchored component of membrane;	10.7987	26.3587	9.324	6.12567	2.82697	1.15816	0.656978
AT5G01890	PXC2	GO:0006468; GO:0016020; GO:0016021; GO:0005886; GO:0000166; GO:0004672; GO:0005524;	BP:protein phosphorylation;CC:membrane;CC:integral component of membrane;CC:plasma membrane;MF:nucleotide binding;MF:protein kinase activity;MF:ATP binding;	0.821333	1.55733	0.551	0.690333	2.82638	1.49062	1.25287
AT2G28410		GO:0008150;GO:0016021; GO:0031225;	BP:biological_process;CC:integral component of membrane;CC:anchored component of membrane;	2.94533	4.65833	1.64833	0.915667	2.82609	1.78686	0.555511
AT3G14870	CHIQL4	GO:0009959; GO:0009639;	BP:negative gravitropism, response to red or far red light;CC:guard cell;	2.11233	3.91933	1.40333	1.71367	2.79287	1.50523	1.22114
AT5G63310	NDPK2	GO:0016310; GO:0009411; GO:0009734; GO:0006228; GO:0006241; GO:0009585; GO:0009117; GO:0006183; GO:0042542; GO:0006165; GO:0009579; GO:0009941; GO:0009536; GO:0009570; GO:0005634; GO:0005737; GO:0009507; GO:0000166; GO:0016740; GO:0046872; GO:0005524; GO:0016301; GO:0004550; GO:0005515;	BP:phosphorylation;BP:response to UV;BP:auxin-activated signaling pathway;BP:UTP biosynthetic process;BP:CTP biosynthetic process;BP:red, far-red light;phototransduction;BP:nucleotide metabolic process;BP:GTP biosynthetic process;BP:response to hydrogen peroxide;BP:nucleoside diphosphate phosphorylation;CC:thylakoid;CC:chloroplast envelope;CC:plastid;CC:chloroplast stroma;CC:nucleus;CC:cytoplasm;…	58.3753	85.1493	30.505	48.4577	2.79132	1.91363	1.58852
AT3G28290	AT14A	GO:0016021; GO:0016020;	CC:integral component of membrane;CC:membrane;	2.763	4.42867	1.587	0.98	2.79059	1.74102	0.617517
AT3G28300	AT14A	GO:0016021; GO:0016020;	CC:integral component of membrane;CC:membrane;	2.763	4.42867	1.587	0.98	2.79059	1.74102	0.617517
AT3G11630	BAS1	GO:0042742; GO:0098869; GO:0009409; GO:0045454; GO:0055114;GO:0009579; GO:0009941; GO:0009536; GO:0009570; GO:0010319; GO:0005623; GO:0048046; GO:0009507; GO:0051920; GO:0004601; GO:0005515; GO:0016491; GO:0016209;	BP:defense response to bacterium;BP:cellular oxidant detoxification;BP:response to cold;BP:cell redox homeostasis;BP:oxidation-reduction process;CC:thylakoid;CC:chloroplast envelope;CC:plastid;CC:chloroplast stroma;CC:stromule;CC:cell;CC:apoplast;CC:chloroplast;MF:peroxiredoxin activity;MF:peroxidase activity;MF:protein binding;MF:oxidoreductase activity;MF:antioxidant activity;	326.672	515.89	185.721	243.584	2.77777	1.75894	1.31156
AT3G21055	PSBTN	GO:0015979;GO:0009579; GO:0009535; GO:0009536; GO:0009523; GO:0016020; GO:0009507; GO:0005515;	BP:photosynthesis;CC:thylakoid;CC:chloroplast thylakoid membrane;CC:plastid;CC:photosystem II;CC:membrane;CC:chloroplast;MF:protein binding;	1321.6	1878.9	676.599	828.905	2.77697	1.9533	1.22511
AT2G47930	AGP26	GO:0080167;GO:0005886; GO:0016021; GO:0016020; GO:0031225;	BP:response to karrikin;CC:plasma membrane;CC:integral component of membrane;CC:membrane;CC:anchored component of membrane;	28.7097	44.6183	16.1197	12.7213	2.76794	1.78103	0.789181
AT5G19090	HIPP33	GO:0046916; GO:0030001;GO:0005737; GO:0009506; GO:0046914; GO:0046872;	BP:cellular transition metal ion homeostasis;BP:metal ion transport;CC:cytoplasm;CC:plasmodesma;MF:transition metal ion binding;MF:metal ion binding;	8.90433	16.175	5.87767	6.60833	2.75194	1.51494	1.12431
AT3G45850		GO:0007018	BP:microtubule-based movement;CC:cytoplasm;MF:ATP-dependent microtubule motor activity, plus-end-directed, microtubule binding	2.322	4.35033	1.59067	2.16167	2.73491	1.45977	1.35897
AT1G09340	CRB	GO:0042742; GO:0009611; GO:0006364; GO:0032544; GO:0045727; GO:0010468; GO:0007623; GO:0000272; GO:0045893; GO:0009409; GO:0042631; GO:0009658; GO:0005975; GO:0005996; GO:0048046; GO:0005737; GO:0009536; GO:0005773; GO:0009570; GO:0010319; GO:0016020; GO:0005777; GO:0009941; GO:0010287; GO:0009506; GO:0009507; GO:0000427; GO:0005840;GO:0010297; GO:0003677; GO:0050662; GO:0003824; GO:0019843; GO:0…	BP:defense response to bacterium;BP:response to wounding;BP:rRNA processing;BP:plastid translation;BP:positive regulation of translation;BP:regulation of gene expression;BP:circadian rhythm;BP:polysaccharide catabolic process;BP:positive regulation of transcription, DNA-templated;BP:response to cold;BP:cellular response to water deprivation;BP:chloroplast organization;BP:carbohydrate metabolic pr…	140.45	219.516	80.5023	114.148	2.72682	1.74467	1.41795
AT5G58300		GO:0006468; GO:0016310; GO:0016020; GO:0016021; GO:0005886; GO:0016301; GO:0000166; GO:0004672; GO:0005524;	BP:protein phosphorylation;BP:phosphorylation;CC:membrane;CC:integral component of membrane;CC:plasma membrane;MF:kinase activity;MF:nucleotide binding;MF:protein kinase activity;MF:ATP binding;	1.38333	3.34	1.22933	1.195	2.71692	1.12527	0.972072
AT1G51170	UNC	GO:0006468; GO:0016310; GO:0051782; GO:0080060; GO:0036290; GO:0035556;GO:0005737; GO:0005886; GO:0005634; GO:0004674; GO:0008134; GO:0016301; GO:0000166; GO:0016740; GO:0004672; GO:0005524;	BP:protein phosphorylation;BP:phosphorylation;BP:negative regulation of cell division;BP:integument development;BP:protein trans-autophosphorylation;BP:intracellular signal transduction;CC:cytoplasm;CC:plasma membrane;CC:nucleus;MF:protein serine/threonine kinase activity;MF:transcription factor binding;MF:kinase activity;MF:nucleotide binding;MF:transferase activity;MF:protein kinase activity;MF…	3.58967	6.22667	2.29667	4.14967	2.71118	1.56299	1.80682
AT4G28660	PSB28	GO:0015979;GO:0009579; GO:0009535; GO:0009536; GO:0009523; GO:0009570; GO:0016020; GO:0009654; GO:0009507; GO:0005515;	BP:photosynthesis;CC:thylakoid;CC:chloroplast thylakoid membrane;CC:plastid;CC:photosystem II;CC:chloroplast stroma;CC:membrane;CC:photosystem II oxygen evolving complex;CC:chloroplast;MF:protein binding;	36.2353	53.0163	19.6223	28.4693	2.70184	1.84664	1.45086
AT2G42870	PAR1	GO:0032502; GO:0009742; GO:0040008; GO:0006355; GO:0045892; GO:0006351; GO:0009641; GO:0005634; GO:0003712; GO:0046983; GO:0042803;	BP:developmental process;BP:brassinosteroid mediated signaling pathway;BP:regulation of growth;BP:regulation of transcription, DNA-templated;BP:negative regulation of transcription, DNA-templated;BP:transcription, DNA-templated;BP:shade avoidance;CC:nucleus;MF:transcription cofactor activity;MF:protein dimerization activity;MF:protein homodimerization activity;	3.31767	7.15867	2.66133	1.81233	2.68988	1.24662	0.680987
AT2G42900		GO:0008150;GO:0005575;	BP:biological_process;CC:cellular_component;	4.26233	9.00967	3.351	6.34	2.68865	1.27196	1.89197
AT3G24430	HCF101	GO:0016226;GO:0009536; GO:0009570; GO:0009507; GO:0051536; GO:0046872; GO:0000166; GO:0005524;	BP:iron-sulfur cluster assembly;CC:plastid;CC:chloroplast stroma;CC:chloroplast;MF:iron-sulfur cluster binding;MF:metal ion binding;MF:nucleotide binding;MF:ATP binding;	25.4573	40.763	15.1787	23.2997	2.68555	1.67718	1.53503
AT2G24090	RPL35	GO:0006412;GO:0009536; GO:0015934; GO:0005840; GO:0030529; GO:0005622; GO:0009507; GO:0003735;	BP:translation;CC:plastid;CC:large ribosomal subunit;CC:ribosome;CC:intracellular ribonucleoprotein complex;CC:intracellular;CC:chloroplast;MF:structural constituent of ribosome;	145.196	218.175	81.3417	122.17	2.68221	1.78501	1.50194
AT1G79500	KDSA1	GO:0071555; GO:0048868; GO:0046364; GO:0010306; GO:0009860; GO:0009058; GO:0008152;GO:0005737; GO:0016740; GO:0008676; GO:0003824;	BP:cell wall organization;BP:pollen tube development;BP:monosaccharide biosynthetic process;BP:rhamnogalacturonan II biosynthetic process;BP:pollen tube growth;BP:biosynthetic process;BP:metabolic process;CC:cytoplasm;MF:transferase activity;MF:3-deoxy-8-phosphooctulonate synthase activity;MF:catalytic activity;	2.68167	4.69233	1.75567	2.855	2.67268	1.52743	1.62616
AT2G35880	WDL4	GO:0005856; GO:0005737; GO:0005874;	CC:cytoskeleton;CC:cytoplasm;CC:microtubule;	11.825	19.258	7.20567	5.52367	2.67262	1.64107	0.766573
AT1G48350	RPL18	GO:0006412;GO:0005737; GO:0009941; GO:0009536; GO:0005840; GO:0005730; GO:0009570; GO:0030529; GO:0005622; GO:0009507; GO:0008097; GO:0019843; GO:0003735; GO:0003723;	BP:translation;CC:cytoplasm;CC:chloroplast envelope;CC:plastid;CC:ribosome;CC:nucleolus;CC:chloroplast stroma;CC:intracellular ribonucleoprotein complex;CC:intracellular;CC:chloroplast;MF:5S rRNA binding;MF:rRNA binding;MF:structural constituent of ribosome;MF:RNA binding;	127.612	190.098	71.19	104.896	2.6703	1.79256	1.47347
AT4G30330		GO:0000387; GO:0000398;GO:0046540; GO:0071011; GO:0030529; GO:0019013; GO:0005687; GO:0005686; GO:0005685; GO:0005682; GO:0005681; GO:0003674;	BP:spliceosomal snRNP assembly;BP:mRNA splicing, via spliceosome;CC:U4/U6 x U5 tri-snRNP complex;CC:precatalytic spliceosome;CC:intracellular ribonucleoprotein complex;CC:viral nucleocapsid;CC:U4 snRNP;CC:U2 snRNP;CC:U1 snRNP;CC:U5 snRNP;CC:spliceosomal complex;MF:molecular_function;	5.23467	9.47267	3.549	7.04067	2.66911	1.47497	1.98385
AT4G24930		GO:0008150;GO:0009579; GO:0009536; GO:0031977; GO:0009543; GO:0009507;	BP:biological_process;CC:thylakoid;CC:plastid;CC:thylakoid lumen;CC:chloroplast thylakoid lumen;CC:chloroplast;	41.83	62.3447	23.4073	38.5543	2.66347	1.78705	1.6471
AT1G17650	GLYR2	GO:0055114;GO:0009536; GO:0009570; GO:0009507; GO:0004616; GO:0030267; GO:0051287; GO:0016491;	BP:oxidation-reduction process;CC:plastid;CC:chloroplast stroma;CC:chloroplast;MF:phosphogluconate dehydrogenas;MF:glyoxylate reductas;MF:NAD binding;MF:oxidoreductase activity;	12.406	22.586	8.50267	9.85	2.65634	1.45907	1.15846
AT5G08050		GO:0090391; GO:0009658; GO:0010196; GO:0045893; GO:0080167; GO:0010027;GO:0009579; GO:0009535; GO:0009534; GO:0016021; GO:0016020; GO:0009515; GO:0009507;	BP:granum assembly;BP:chloroplast organization;BP:nonphotochemical quenching;BP:positive regulation of transcription, DNA-templated;BP:response to karrikin;BP:thylakoid membrane organization;CC:thylakoid;CC:chloroplast thylakoid membrane;CC:chloroplast thylakoid;CC:integral component of membrane;CC:membrane;CC:granal stacked thylakoid;CC:chloroplast;	113.925	153.236	57.9533	82.4477	2.64413	1.96581	1.42266
AT4G25260	PMEI7	GO:0043086; GO:0009641;GO:0048046; GO:0005576; GO:0004857;	BP:negative regulation of catalytic activity;BP:shade avoidance;CC:apoplast;CC:extracellular region;MF:enzyme inhibitor activity;	6.25933	13.4427	5.08633	3.44733	2.6429	1.23062	0.677764
AT3G09820	ADK1	GO:0080094; GO:0044209; GO:0016310; GO:0006166; GO:0016032; GO:0046686; GO:0006169; GO:0005829; GO:0016020; GO:0048046; GO:0005886; GO:0005634; GO:0009506; GO:0009507; GO:0016301; GO:0000166; GO:0016773; GO:0004001; GO:0005524; GO:0016740; GO:0005507;	BP:response to trehalose-6-phosphate;BP:AMP salvage;BP:phosphorylation;BP:purine ribonucleoside salvage;BP:viral process;BP:response to cadmium ion;BP:adenosine salvage;CC:cytosol;CC:membrane;CC:apoplast;CC:plasma membrane;CC:nucleus;CC:plasmodesma;CC:chloroplast;MF:kinase activity;MF:nucleotide binding;MF:phosphotransferase activity, alcohol group as acceptor;MF:adenosine kinase activity;MF:ATP …	30.924	57.4037	21.816	31.5763	2.63126	1.41749	1.44739
AT5G65020	ANN2	GO:0015774; GO:0009414; GO:0009651; GO:0009409; GO:0009408;GO:0009579; GO:0005737; GO:0005829; GO:0016020; GO:0048046; GO:0005634; GO:0005544; GO:0005509;	BP:polysaccharide transport;BP:response to water deprivation;BP:response to salt stress;BP:response to cold;BP:response to heat;CC:thylakoid;CC:cytoplasm;CC:cytosol;CC:membrane;CC:apoplast;CC:nucleus;MF:calcium-dependent phospholipid binding;MF:calcium ion binding;	3.883	9.03667	3.44967	5.39533	2.61958	1.12562	1.56402
AT1G02335	GL22	GO:0010497; GO:2000280; GO:0005618; GO:0048046; GO:0005576; GO:0009506; GO:0030145; GO:0045735; GO:0046872;	BP:plasmodesmata-mediated intercellular transport;BP:regulation of root development;CC:cell wall;CC:apoplast;CC:extracellular region;CC:plasmodesma;MF:manganese ion binding;MF:nutrient reservoir activity;MF:metal ion binding;	4.68967	22.1923	8.47733	2.64933	2.61784	0.553201	0.31252
AT5G52280		GO:0008150; GO:0009507;GO:0003674;	BP:biological_process;CC:chloroplast;MF:molecular_function;	0.958	2.08567	0.797333	0.858667	2.6158	1.20151	1.07692
AT3G62160		GO:0016740; GO:0016747; GO:0016410;	MF:transferase activity;MF:transferase activity, transferring acyl groups other than amino-acyl groups;MF:N-acyltransferase activity;	1.04567	2.87733	1.10033	0.635333	2.61497	0.950318	0.577401
AT5G62840		GO:0016311; GO:0005829; GO:0016791;	BP:dephosphorylation;CC:cytosol;MF:phosphatase activity;	4.31333	6.35867	2.436	2.95533	2.61029	1.77066	1.21319
AT5G12250	TUBB6	GO:0007010; GO:0009409; GO:0009651; GO:0007017;GO:0005856; GO:0005737; GO:0015630; GO:0005886; GO:0005874; GO:0003924; GO:0000166; GO:0005200; GO:0005525;	BP:cytoskeleton organization;BP:response to cold;BP:response to salt stress;BP:microtubule-based process;CC:cytoskeleton;CC:cytoplasm;CC:microtubule cytoskeleton;CC:plasma membrane;CC:microtubule;MF:GTPase activity;MF:nucleotide binding;MF:structural constituent of cytoskeleton;MF:GTP binding;	65.0253	115.81	44.3803	35.637	2.60948	1.46518	0.802991
AT5G05580	FAD8	GO:0006633; GO:0006631; GO:0006636; GO:0006629; GO:0055114; GO:0009941; GO:0009536; GO:0031969; GO:0016020; GO:0016021; GO:0009507; GO:0016717; GO:0042389; GO:0016491;	BP:fatty acid biosynthetic process;BP:fatty acid metabolic process;BP:unsaturated fatty acid biosynthetic process;BP:lipid metabolic process;BP:oxidation-reduction process;CC:chloroplast envelope;CC:plastid;CC:chloroplast membrane;CC:membrane;CC:integral component of membrane;CC:chloroplast;MF:oxidoreductase activity, acting on paired donors, with oxidation of a pair of donors resulting in the re…	2.68433	3.83967	1.47167	2.08133	2.60906	1.82401	1.41427
AT1G22330		GO:0008150; GO:0003723; GO:0003676;	BP:biological_process;MF:RNA binding;MF:nucleic acid binding;	2.51833	5.83267	2.23667	1.65533	2.60775	1.12593	0.740089
AT2G29180		GO:0008150;GO:0009535; GO:0016021; GO:0016020;	BP:biological_process;CC:chloroplast thylakoid membrane;CC:integral component of membrane;CC:membrane;	23.428	37.86	14.5257	17.1397	2.60642	1.61287	1.17996
AT5G48900		GO:0045490;GO:0030570; GO:0046872; GO:0016829;	BP:pectin catabolic process;MF:pectate lyase activity;MF:metal ion binding;MF:lyase activity;	11.3877	22.25	8.54267	7.31433	2.60457	1.33303	0.856212
AT2G40150	TBL28	GO:0071554; GO:0050826;GO:0005794; GO:0016021; GO:0016020; GO:0016413;	BP:cell wall organization or biogenesis;BP:response to freezing;CC:Golgi apparatus;CC:integral component of membrane;CC:membrane;MF:O-acetyltransferase activity;	1.72967	2.40733	0.926667	1.30033	2.59784	1.86655	1.40324
AT4G12880	ENODL19	GO:0048046; GO:0046658; GO:0009055;	CC:apoplast;CC:anchored component of plasma membrane;MF:electron carrier activity;	4.88433	12.2413	4.73	2.73	2.58802	1.03263	0.577167
AT5G62670	AHA11	GO:0006810; GO:0015992; GO:1902600; GO:0006811; GO:0006754; GO:0016020; GO:0005886; GO:0016021;GO:0016787; GO:0000166; GO:0046872; GO:0016887; GO:0008553; GO:0005524;	BP:transport;BP:proton transport;BP:hydrogen ion transmembrane transport;BP:ion transport;BP:ATP biosynthetic process;CC:membrane;CC:plasma membrane;CC:integral component of membrane;MF:hydrolase activity;MF:nucleotide binding;MF:metal ion binding;MF:ATPase activity;MF:hydrogen-exporting ATPase activity, phosphorylative mechanism;MF:ATP binding;	25.624	36.6873	14.195	14.012	2.58453	1.80514	0.987108
AT5G66920	sks17	GO:0055114; GO:0080167; GO:0005618; GO:0009505; GO:0009506;GO:0016722; GO:0005507; GO:0016491;	BP:oxidation-reduction process;BP:response to karrikin;CC:cell wall;CC:plant-type cell wall;CC:plasmodesma;MF:oxidoreductase activity, oxidizing metal ions;MF:copper ion binding;MF:oxidoreductase activity;	2.437	3.84867	1.49	1.53067	2.583	1.63557	1.02729
AT3G44890	RPL9	GO:0006412;GO:0009941; GO:0009536; GO:0030529; GO:0009570; GO:0005739; GO:0000311; GO:0005840; GO:0005622; GO:0009507; GO:0003735; GO:0003723; GO:0019843;	BP:translation;CC:chloroplast envelope;CC:plastid;CC:intracellular ribonucleoprotein complex;CC:chloroplast stroma;CC:mitochondrion;CC:plastid large ribosomal subunit;CC:ribosome;CC:intracellular;CC:chloroplast;MF:structural constituent of ribosome;MF:RNA binding;MF:rRNA binding;	58.8373	89.2763	34.5803	44.492	2.58171	1.70147	1.28663
AT5G13460	IQD11	GO:0008150; GO:0005886;	BP:biological_process;CC:plasma membrane;	3.44633	5.65733	2.196	2.38267	2.5762	1.56937	1.085
AT4G39710	PNSL4	GO:0000413; GO:0006810; GO:0061077;GO:0009579; GO:0009535; GO:0009536; GO:0009543; GO:0009507; GO:0003755; GO:0016853; GO:0005528; GO:0005515;	BP:protein peptidyl-prolyl isomerization;BP:transport;BP:chaperone-mediated protein folding;CC:thylakoid;CC:chloroplast thylakoid membrane;CC:plastid;CC:chloroplast thylakoid lumen;CC:chloroplast;MF:peptidyl-prolyl cis-trans isomerase activity;MF:isomerase activity;MF:FK506 binding;MF:protein binding;	26.8963	38.9507	15.1197	19.815	2.57616	1.7789	1.31054
AT2G38540	LTP1	GO:0006869; GO:0006810; GO:0071555;GO:0009534; GO:0005618; GO:0048046; GO:0005576; GO:0005886; GO:0009505; GO:0008289; GO:0005516;	BP:lipid transport;BP:transport;BP:cell wall organization;CC:chloroplast thylakoid;CC:cell wall;CC:apoplast;CC:extracellular region;CC:plasma membrane;CC:plant-type cell wall;MF:lipid binding;MF:calmodulin binding;	303.568	415.342	161.234	233.841	2.57602	1.88278	1.45032
AT2G37900	NPF5.6	GO:0006857; GO:0006810; GO:0016021; GO:0016020; GO:0005215;	BP:oligopeptide transport;BP:transport;CC:integral component of membrane;CC:membrane;MF:transporter activity;	0.616333	6.40433	2.48633	1.06267	2.57581	0.247888	0.427403
AT2G37025	TRFL8	GO:0031627; GO:0000783; GO:0003691; GO:0003677;	BP:telomeric loop formation;CC:nuclear telomere cap complex;MF:double-stranded telomeric DNA binding;MF:DNA binding;	2.59	3.741	1.45433	2.13333	2.57231	1.78088	1.46688
AT4G24540	AGL24	GO:0030154; GO:0007275; GO:0048438; GO:0009739; GO:0000060; GO:0048510; GO:0009908; GO:0045893; GO:0010220; GO:0010077; GO:0006355; GO:0045944; GO:0006351; GO:0005737; GO:0005634; GO:0003677; GO:0043565; GO:0000977; GO:0003700; GO:0005515; GO:0046983; GO:0046982;	BP:cell differentiation;BP:multicellular organism development;BP:floral whorl development;BP:response to gibberellin;BP:protein import into nucleus, translocation;BP:regulation of timing of transition from vegetative to reproductive phase;BP:flower development;BP:positive regulation of transcription, DNA-templated;BP:positive regulation of vernalization response;BP:maintenance of inflorescence me…	8.84767	18.4987	7.19467	9.14067	2.57116	1.22975	1.27048
AT3G59780		GO:0008150;GO:0009534; GO:0005634; GO:0009507; GO:0003674;	BP:biological_process;CC:chloroplast thylakoid;CC:nucleus;CC:chloroplast;MF:molecular_function;	29.229	39.4303	15.3607	22.233	2.56697	1.90285	1.4474
AT1G49730		GO:0006468; GO:0016310; GO:0016020; GO:0016021; GO:0005886; GO:0016301; GO:0004672; GO:0005524;	BP:protein phosphorylation;BP:phosphorylation;CC:membrane;CC:integral component of membrane;CC:plasma membrane;MF:kinase activity;MF:protein kinase activity;MF:ATP binding;	6.01167	8.81533	3.43567	4.01433	2.56583	1.74978	1.16843
AT1G66940		GO:0016310;GO:0016020; GO:0016021; GO:0016301; GO:0030247;	BP:phosphorylation;CC:membrane;CC:integral component of membrane;MF:kinase activity;MF:polysaccharide binding;	11.988	17.1637	6.72367	6.447	2.55272	1.78296	0.958852
AT1G11860		GO:0006546; GO:0046686; GO:0032259;GO:0009941; GO:0022626; GO:0009534; GO:0009570; GO:0016020; GO:0005739; GO:0048046; GO:0009507; GO:0004047; GO:0008483; GO:0016740;	BP:glycine catabolic process;BP:response to cadmium ion;BP:methylation;CC:chloroplast envelope;CC:cytosolic ribosome;CC:chloroplast thylakoid;CC:chloroplast stroma;CC:membrane;CC:mitochondrion;CC:apoplast;CC:chloroplast;MF:aminomethyltransferase activity;MF:transaminase activity;MF:transferase activity;	297.077	434.037	170.168	242.704	2.55064	1.74579	1.42626
AT2G13610	ABCG5	GO:0006810; GO:0055085; GO:0016020; GO:0016021; GO:0005886;GO:0042626; GO:0000166; GO:0016887; GO:0005524;	BP:transport;BP:transmembrane transport;CC:membrane;CC:integral component of membrane;CC:plasma membrane;MF:ATPase activity, coupled to transmembrane movement of substances;MF:nucleotide binding;MF:ATPase activity;MF:ATP binding;	3.1	7.03533	2.761	2.13	2.54811	1.12278	0.77146
AT1G44575	PSBS	GO:0015979; GO:0010196; GO:0080167; GO:0010027; GO:0055085; GO:0009579; GO:0009535; GO:0009523; GO:0009534; GO:0016021; GO:0016020; GO:0009517; GO:0009536; GO:0009507;GO:0022891; GO:0016168; GO:0019904; GO:0051738;	BP:photosynthesis;BP:nonphotochemical quenching;BP:response to karrikin;BP:thylakoid membrane organization;BP:transmembrane transport;CC:thylakoid;CC:chloroplast thylakoid membrane;CC:photosystem II;CC:chloroplast thylakoid;CC:integral component of membrane;CC:membrane;CC:PSII associated light-harvesting complex II;CC:plastid;CC:chloroplast;MF:substrate-specific transmembrane transporter activity…	379.93	540.234	212.388	261.225	2.54362	1.78885	1.22994
AT2G30695		GO:0015031; GO:0006457; GO:0009570; GO:0009507;	BP:protein transport;BP:protein folding;CC:chloroplast stroma;CC:chloroplast;	7.573	14.1207	5.568	9.70567	2.53604	1.36009	1.74312
AT1G75690	LQY1	GO:0010206;GO:0009535; GO:0009534; GO:0009570; GO:0016021; GO:0016020; GO:0009536; GO:0009579; GO:0009507; GO:0016853; GO:0051082; GO:0046872; GO:0003756; GO:0031072;	BP:photosystem II repair;CC:chloroplast thylakoid membrane;CC:chloroplast thylakoid;CC:chloroplast stroma;CC:integral component of membrane;CC:membrane;CC:plastid;CC:thylakoid;CC:chloroplast;MF:isomerase activity;MF:unfolded protein binding;MF:metal ion binding;MF:protein disulfide isomerase activity;MF:heat shock protein binding;	129.568	168.676	66.6973	73.5427	2.52898	1.94262	1.10263
AT3G63410	VTE3	GO:0008152; GO:0010189; GO:0032259; GO:0010236;GO:0009941; GO:0009536; GO:0016021; GO:0016020; GO:0009706; GO:0009528; GO:0009507; GO:0008757; GO:0016740; GO:0051741; GO:0005515; GO:0008168; GO:0102550;	BP:metabolic process;BP:vitamin E biosynthetic process;BP:methylation;BP:plastoquinone biosynthetic process;CC:chloroplast envelope;CC:plastid;CC:integral component of membrane;CC:membrane;CC:chloroplast inner membrane;CC:plastid inner membrane;CC:chloroplast;MF:S-adenosylmethionine-dependent methyltransferase activity;MF:transferase activity;MF:2-methyl-6-phytyl-1,4-benzoquinone methyltransferas…	166.706	225.454	89.1717	117.688	2.52832	1.8695	1.31979
AT3G63140	CSP41A	GO:0009735; GO:0006364; GO:0032544; GO:0045727; GO:0007623; GO:0045893; GO:0009658; GO:0048046; GO:0009579; GO:0009534; GO:0009536; GO:0009570; GO:0010319; GO:0009941; GO:0010287; GO:0009507; GO:0005840;GO:0050662; GO:0008266; GO:0003824; GO:0019843; GO:0003723; GO:0005515;	BP:response to cytokinin;BP:rRNA processing;BP:plastid translation;BP:positive regulation of translation;BP:circadian rhythm;BP:positive regulation of transcription, DNA-templated;BP:chloroplast organization;CC:apoplast;CC:thylakoid;CC:chloroplast thylakoid;CC:plastid;CC:chloroplast stroma;CC:stromule;CC:chloroplast envelope;CC:plastoglobule;CC:chloroplast;CC:ribosome;MF:coenzyme binding;MF:pol;M…	153.9	237.309	93.9157	103.783	2.52683	1.6387	1.10507
AT1G32470	GDH3	GO:0019464;GO:0005960; GO:0005739; GO:0009507;	BP:glycine decarboxylation via glycine cleavage system;CC:glycine cleavage complex;CC:mitochondrion;CC:chloroplast;	282.903	429.17	169.935	177.934	2.5255	1.66477	1.04707
AT4G28220	NDB1	GO:0055114;GO:0016020; GO:0005777; GO:0005739; GO:0005743; GO:0031314; GO:0005758; GO:0005509; GO:0016491;	BP:oxidation-reduction process;CC:membrane;CC:peroxisome;CC:mitochondrion;CC:mitochondrial inner membrane;CC:extrinsic component of mitochondrial inner membrane;CC:mitochondrial intermembrane space;MF:calcium ion binding;MF:oxidoreductase activity;	5.21333	8.507	3.36867	5.602	2.52533	1.5476	1.66297
AT1G20190	EXPA11	GO:0009664; GO:0071555;GO:0005618; GO:0016020; GO:0005576;	BP:plant-type cell wall organization;BP:cell wall organization;CC:cell wall;CC:membrane;CC:extracellular region;	29.4387	44.9263	17.804	25.589	2.52338	1.65349	1.43726
AT1G78970	LUP1	GO:0042299; GO:0016853; GO:0016829; GO:0102245; GO:0016866; GO:0042300;	MF:lupeol synthase activity;MF:isomerase activity;MF:lyase activity;MF:old GO;MF:intramolecular transferase activity;MF:beta-amyrin synthase activity;	2.28933	6.07067	2.40767	1.55033	2.52139	0.950851	0.643915
AT1G43790	TED6	GO:0016021; GO:0016020;	CC:integral component of membrane;CC:membrane;	4.616	20.492	8.149	3.41667	2.51466	0.56645	0.419274
AT3G50685		GO:0008150;GO:0016021; GO:0016020;	BP:biological_process;CC:integral component of membrane;CC:membrane;	90.4867	126.396	50.3037	72.376	2.51267	1.79881	1.43878
AT1G32100	PRR1	GO:0009807; GO:0055114; GO:0010283; GO:0016491;	BP:lignan biosynthetic process;BP:oxidation-reduction process;MF:pinoresinol reductase activity;MF:oxidoreductase activity;	4.801	12.0993	4.819	3.643	2.51076	0.996265	0.755966
AT5G48485	DIR1	GO:0006869; GO:0009862; GO:0006810; GO:0009627; GO:0006952;GO:0048046; GO:0005783; GO:0005576; GO:0030054; GO:0009506; GO:0008289; GO:0005504; GO:0005515; GO:0046872; GO:0043621; GO:0008270;	BP:lipid transport;BP:systemic acquired resistance, salicylic acid mediated signaling pathway;BP:transport;BP:systemic acquired resistance;BP:defense response;CC:apoplast;CC:endoplasmic reticulum;CC:extracellular region;CC:cell junction;CC:plasmodesma;MF:lipid binding;MF:fatty acid binding;MF:protein binding;MF:metal ion binding;MF:protein self-association;MF:zinc ion binding;	28.842	43.3147	17.283	17.7097	2.5062	1.66881	1.02469
AT4G01310	RPL5	GO:0009735; GO:0006412; GO:0000027;GO:0009941; GO:0009536; GO:0022626; GO:0030529; GO:0009570; GO:0016020; GO:0005840; GO:0009507; GO:0005622; GO:0019843; GO:0003735; GO:0003723;	BP:response to cytokinin;BP:translation;BP:ribosomal large subunit assembly;CC:chloroplast envelope;CC:plastid;CC:cytosolic ribosome;CC:intracellular ribonucleoprotein complex;CC:chloroplast stroma;CC:membrane;CC:ribosome;CC:chloroplast;CC:intracellular;MF:rRNA binding;MF:structural constituent of ribosome;MF:RNA binding;	250.463	348.019	138.89	172.469	2.50572	1.80333	1.24177
AT1G71790		GO:0007015; GO:0000902; GO:0051016; GO:0030036; GO:0009408; GO:0051693;GO:0005856; GO:0005737; GO:0005884; GO:0008290; GO:0051015; GO:0003779;	BP:actin filament organization;BP:cell morphogenesis;BP:barbed-end actin filament capping;BP:actin cytoskeleton organization;BP:response to heat;BP:actin filament capping;CC:cytoskeleton;CC:cytoplasm;CC:actin filament;CC:F-actin capping protein complex;MF:actin filament binding;MF:actin binding;	7.928	12.417	4.97167	5.11267	2.49755	1.59464	1.02836
AT1G09750	AED3	GO:0009627; GO:0043067; GO:0030163; GO:0006508; GO:0005618; GO:0048046; GO:0005576; GO:0009505;GO:0016787; GO:0000166; GO:0004190; GO:0008233;	BP:systemic acquired resistance;BP:regulation of programmed cell death;BP:protein catabolic process;BP:proteolysis;CC:cell wall;CC:apoplast;CC:extracellular region;CC:plant-type cell wall;MF:hydrolase activity;MF:nucleotide binding;MF:aspartic-type endopeptidase activity;MF:peptidase activity;	43.942	74.525	29.9523	25.8027	2.48812	1.46706	0.861458
AT5G17870	PSRP6	GO:0006412;GO:0009536; GO:0005840; GO:0030529; GO:0009507; GO:0019843; GO:0003735;	BP:translation;CC:plastid;CC:ribosome;CC:intracellular ribonucleoprotein complex;CC:chloroplast;MF:rRNA binding;MF:structural constituent of ribosome;	144.268	214.594	86.2717	113.129	2.48742	1.67225	1.31131
AT5G22340		GO:0008150;GO:0016021; GO:0016020;	BP:biological_process;CC:integral component of membrane;CC:membrane;	19.6957	28.6863	11.6313	18.473	2.4663	1.69333	1.58821
AT1G65230		GO:0008150;GO:0016021; GO:0016020; GO:0009507;	BP:biological_process;CC:integral component of membrane;CC:membrane;CC:chloroplast;	28.7563	35.5117	14.418	19.8603	2.46301	1.99447	1.37747
AT3G62020	GLP10	GO:0010497; GO:2000280; GO:0005618; GO:0048046; GO:0005576; GO:0009505; GO:0009506; GO:0030145; GO:0045735; GO:0046872;	BP:plasmodesmata-mediated intercellular transport;BP:regulation of root development;CC:cell wall;CC:apoplast;CC:extracellular region;CC:plant-type cell wall;CC:plasmodesma;MF:manganese ion binding;MF:nutrient reservoir activity;MF:metal ion binding;	5.199	20.8447	8.47933	3.24867	2.45829	0.613138	0.383128
AT2G34560		GO:0005634;GO:0016787; GO:0005524; GO:0016887;	CC:nucleus;MF:hydrolase activity;MF:ATP binding;MF:ATPase activity;	14.2493	32.734	13.3477	12.035	2.45241	1.06755	0.901656
AT3G49260	iqd21	GO:0008150;	BP:biological_process;	14.3097	20.2563	8.28267	7.872	2.44563	1.72766	0.950419
AT2G32720	CYTB5-B	GO:0043447; GO:0055114;GO:0005783; GO:0016021; GO:0016020; GO:0005789; GO:0020037; GO:0005515; GO:0046872;	BP:alkane biosynthetic process;BP:oxidation-reduction process;CC:endoplasmic reticulum;CC:integral component of membrane;CC:membrane;CC:endoplasmic reticulum membrane;MF:heme binding;MF:protein binding;MF:metal ion binding;	3.773	6.378	2.61633	3.07	2.43776	1.44209	1.1734
AT4G21650	SBT3.13	GO:0006508; GO:0005576; GO:0009505;GO:0004252; GO:0016787; GO:0008233; GO:0008236;	BP:proteolysis;CC:extracellular region;CC:plant-type cell wall;MF:serine-type endopeptidase activity;MF:hydrolase activity;MF:peptidase activity;MF:serine-type peptidase activity;	16.9997	39.435	16.1793	13.577	2.43737	1.0507	0.839157
AT2G36145		GO:0008150;GO:0009535; GO:0009570; GO:0009507;	BP:biological_process;CC:chloroplast thylakoid membrane;CC:chloroplast stroma;CC:chloroplast;	22.0197	39.0717	16.042	27.6763	2.43559	1.37263	1.72524
AT2G33800	RPS5	GO:0009955; GO:1901259; GO:0046686; GO:0009409; GO:0032544; GO:0006412;GO:0009579; GO:0009535; GO:0016020; GO:0015935; GO:0009534; GO:0009570; GO:0005634; GO:0005840; GO:0009536; GO:0005763; GO:0030529; GO:0009507; GO:0019843; GO:0003735; GO:0003723;	BP:adaxial/abaxial pattern specification;BP:chloroplast rRNA processing;BP:response to cadmium ion;BP:response to cold;BP:plastid translation;BP:translation;CC:thylakoid;CC:chloroplast thylakoid membrane;CC:membrane;CC:small ribosomal subunit;CC:chloroplast thylakoid;CC:chloroplast stroma;CC:nucleus;CC:ribosome;CC:plastid;CC:mitochondrial small ribosomal subunit;CC:intracellular ribonucleoprotein…	221.569	310.05	127.517	170.558	2.43144	1.73757	1.33753
AT5G17170	ENH1	GO:0009535; GO:0009941; GO:0009534; GO:0016021; GO:0016020; GO:0009507; GO:0005506;	CC:chloroplast thylakoid membrane;CC:chloroplast envelope;CC:chloroplast thylakoid;CC:integral component of membrane;CC:membrane;CC:chloroplast;MF:iron ion binding;	50.575	73.0057	30.042	53.9673	2.43012	1.68348	1.7964
AT3G23840	CER26L	GO:0071555; GO:0042761; GO:0009555;GO:0009535; GO:0016747;	BP:cell wall organization;BP:very long-chain fatty acid biosynthetic process;BP:pollen development;CC:chloroplast thylakoid membrane;MF:transferase activity, transferring acyl groups other than amino-acyl groups;	3.58967	6.543	2.69567	2.25333	2.42723	1.33164	0.835909
AT1G55480	ZKT	GO:0010207; GO:0009611; GO:0010206; GO:0009416; GO:0009644; GO:0015979;GO:0009579; GO:0009941; GO:0009535; GO:0009523; GO:0009534; GO:0009570; GO:0016020; GO:0009575; GO:0035448; GO:0009536; GO:0031969; GO:0009507; GO:0005515;	BP:photosystem II assembly;BP:response to wounding;BP:photosystem II repair;BP:response to light stimulus;BP:response to high light intensity;BP:photosynthesis;CC:thylakoid;CC:chloroplast envelope;CC:chloroplast thylakoid membrane;CC:photosystem II;CC:chloroplast thylakoid;CC:chloroplast stroma;CC:membrane;CC:chromoplast stroma;CC:extrinsic component of thylakoid membrane;CC:plastid;CC:chloroplas…	42.7903	55.902	23.0587	32.151	2.42434	1.85572	1.39431
AT1G30380	PSAK	GO:0015979;GO:0009579; GO:0009535; GO:0009536; GO:0009522; GO:0009534; GO:0016021; GO:0016020; GO:0009507; GO:0016168;	BP:photosynthesis;CC:thylakoid;CC:chloroplast thylakoid membrane;CC:plastid;CC:photosystem I;CC:chloroplast thylakoid;CC:integral component of membrane;CC:membrane;CC:chloroplast;MF:chlorophyll binding;	1818.6	2704.84	1120.7	1342.4	2.41353	1.62274	1.19782
AT2G29980	FAD3	GO:0006633; GO:0006631; GO:0006629; GO:0080167; GO:0055114; GO:0006636; GO:0016020; GO:0005789; GO:0005783; GO:0016021; GO:0016717; GO:0042389; GO:0016491;	BP:fatty acid biosynthetic process;BP:fatty acid metabolic process;BP:lipid metabolic process;BP:response to karrikin;BP:oxidation-reduction process;BP:unsaturated fatty acid biosynthetic process;CC:membrane;CC:endoplasmic reticulum membrane;CC:endoplasmic reticulum;CC:integral component of membrane;MF:oxidoreductase activity, acting on paired donors, with oxidation of a pair of donors resulting …	32.6533	50.0643	20.7833	19.0903	2.40887	1.57113	0.91854
AT2G25840	OVA4	GO:0048481; GO:0006436; GO:0006418; GO:0006412;GO:0005737; GO:0009570; GO:0005739; GO:0009536; GO:0009507; GO:0004812; GO:0000166; GO:0016740; GO:0004830; GO:0016874; GO:0005524;	BP:plant ovule development;BP:tryptophanyl-tRNA aminoacylation;BP:tRNA aminoacylation for protein translation;BP:translation;CC:cytoplasm;CC:chloroplast stroma;CC:mitochondrion;CC:plastid;CC:chloroplast;MF:aminoacyl-tRNA ligase activity;MF:nucleotide binding;MF:transferase activity;MF:tryptophan-tRNA ligase activity;MF:ligase activity;MF:ATP binding;	12.8207	20.3307	8.469	10.5947	2.4006	1.51383	1.25099
AT5G21920	YLMG2	GO:0009579; GO:0009535; GO:0009536; GO:0016021; GO:0016020; GO:0009507;	CC:thylakoid;CC:chloroplast thylakoid membrane;CC:plastid;CC:integral component of membrane;CC:membrane;CC:chloroplast;	90.8267	116.905	48.7637	66.1287	2.39737	1.86259	1.35611
AT5G07080		GO:0016740; GO:0016747; GO:0016410;	MF:transferase activity;MF:transferase activity, transferring acyl groups other than amino-acyl groups;MF:N-acyltransferase activity;	2.921	6.83567	2.85367	2.01533	2.3954	1.0236	0.706226
AT1G01790	KEA1	GO:0071805; GO:0006813; GO:0006812; GO:0006811; GO:0055085; GO:1902600; GO:0006810; GO:0098655;GO:0031969; GO:0009941; GO:0009536; GO:0016020; GO:0016021; GO:0009507; GO:0015297; GO:0015299; GO:0015386; GO:0008324;	BP:potassium ion transmembrane transport;BP:potassium ion transport;BP:cation transport;BP:ion transport;BP:transmembrane transport;BP:hydrogen ion transmembrane transport;BP:transport;BP:cation transmembrane transport;CC:chloroplast membrane;CC:chloroplast envelope;CC:plastid;CC:membrane;CC:integral component of membrane;CC:chloroplast;MF:antiporter activity;MF:solut;MF:potassiu;MF:cation transm…	12.5847	21.25	8.88167	12.342	2.39257	1.41693	1.3896
AT5G36790	PGLP1A	GO:0016311; GO:0009853; GO:0008152; GO:0009536; GO:0005829; GO:0009507;GO:0016787; GO:0016791; GO:0008967;	BP:dephosphorylation;BP:photorespiration;BP:metabolic process;CC:plastid;CC:cytosol;CC:chloroplast;MF:hydrolase activity;MF:phosphatase activity;MF:phosphoglycolate phosphatase activity;	20.8263	33.525	14.0307	21.364	2.38941	1.48434	1.52266
AT5G65810		GO:0040007; GO:0045489; GO:0045488; GO:0010394;GO:0005794; GO:0016020; GO:0016021; GO:0005802; GO:0000139; GO:0005768;	BP:growth;BP:pectin biosynthetic process;BP:pectin metabolic process;BP:homogalacturonan metabolic process;CC:Golgi apparatus;CC:membrane;CC:integral component of membrane;CC:trans-Golgi network;CC:Golgi membrane;CC:endosome;	3.966	5.71367	2.394	2.807	2.38666	1.65664	1.17251
AT3G02110	SCPL25	GO:0051603; GO:0009742; GO:0006508; GO:0005615; GO:0005576; GO:0016787; GO:0004180; GO:0004185; GO:0008233;	BP:proteolysis involved in cellular protein catabolic process;BP:brassinosteroid mediated signaling pathway;BP:proteolysis;CC:extracellular space;CC:extracellular region;MF:hydrolase activity;MF:carboxypeptidase activity;MF:serine-type carboxypeptidase activity;MF:peptidase activity;	5.15367	8.115	3.40067	2.667	2.3863	1.51549	0.784258
AT5G63500		GO:0008150;GO:0016021; GO:0016020; GO:0031225;	BP:biological_process;CC:integral component of membrane;CC:membrane;CC:anchored component of membrane;	23.3573	30.523	12.8063	19.9383	2.38343	1.82389	1.55691
AT1G60550	MENB	GO:0042372; GO:0009234; GO:0008152; GO:0005777;GO:0008935; GO:0016853; GO:0003824; GO:0016829;	BP:phylloquinone biosynthetic process;BP:menaquinone biosynthetic process;BP:metabolic process;CC:peroxisome;MF:1,4-dihydroxy-2-naphthoyl-CoA synthase activity;MF:isomerase activity;MF:catalytic activity;MF:lyase activity;	19.899	30.6357	12.907	15.9293	2.37357	1.54172	1.23416
AT5G43750	PNSB5	GO:0006810; GO:0006979;GO:0009535; GO:0031969; GO:0009536; GO:0016021; GO:0016020; GO:0009507;	BP:transport;BP:response to oxidative stress;CC:chloroplast thylakoid membrane;CC:chloroplast membrane;CC:plastid;CC:integral component of membrane;CC:membrane;CC:chloroplast;	18.7953	28.112	11.9077	12.6933	2.36083	1.57842	1.06598
AT3G55330	PPL1	GO:0015979;GO:0009579; GO:0009536; GO:0009523; GO:0031977; GO:0019898; GO:0009543; GO:0009654; GO:0009507; GO:0005509;	BP:photosynthesis;CC:thylakoid;CC:plastid;CC:photosystem II;CC:thylakoid lumen;CC:extrinsic component of membrane;CC:chloroplast thylakoid lumen;CC:photosystem II oxygen evolving complex;CC:chloroplast;MF:calcium ion binding;	37.8147	53.724	22.7653	30.9487	2.3599	1.66106	1.35946
AT5G26850		GO:0008150;	BP:biological_process;	3.02533	5.533	2.347	2.45533	2.35748	1.28902	1.04616
AT1G67090	RBCS-1A	GO:0015977; GO:0015979; GO:0009637; GO:0010218; GO:0019253; GO:0009409; GO:0010114; GO:0055114; GO:0009853; GO:0080158; GO:0022626; GO:0031977; GO:0048046; GO:0009579; GO:0009941; GO:0009536; GO:0009570; GO:0016020; GO:0031969; GO:0009535; GO:0009507;GO:0004497; GO:0016491; GO:0016829; GO:0005507; GO:0016984;	BP:carbon fixation;BP:photosynthesis;BP:response to blue light;BP:response to far red light;BP:reductive pentose-phosphate cycle;BP:response to cold;BP:response to red light;BP:oxidation-reduction process;BP:photorespiration;BP:chloroplast ribulose bisphosphate carboxylase complex biogenesis;CC:cytosolic ribosome;CC:thylakoid lumen;CC:apoplast;CC:thylakoid;CC:chloroplast envelope;CC:plastid;CC:ch…	10499.7	13608.9	5774.15	6041.64	2.35686	1.8184	1.04633
AT3G02830	ZFN1	GO:0090305; GO:0017148; GO:0005829; GO:0005634;GO:0010313; GO:0046872; GO:0004518; GO:0003677; GO:0048027; GO:0003729;	BP:nucleic acid phosphodiester bond hydrolysis;BP:negative regulation of translation;CC:cytosol;CC:nucleus;MF:phytochrome binding;MF:metal ion binding;MF:nuclease activity;MF:DNA binding;MF:mRNA 5'-UTR binding;MF:mRNA binding;	40.3477	50.7697	21.598	36.9617	2.35067	1.86812	1.71135
AT3G16240	TIP2-1	GO:0006810; GO:0006833; GO:0072489;GO:0000326; GO:0005618; GO:0016021; GO:0005794; GO:0005773; GO:0005774; GO:0009705; GO:0016020; GO:0005887; GO:0005886; GO:0009941; GO:0042807; GO:0009505; GO:0009506; GO:0009507; GO:0005215; GO:0015200; GO:0015250;	BP:transport;BP:water transport;BP:methylammonium transmembrane transport;CC:protein storage vacuole;CC:cell wall;CC:integral component of membrane;CC:Golgi apparatus;CC:vacuole;CC:vacuolar membrane;CC:plant-type vacuole membrane;CC:membrane;CC:integral component of plasma membrane;CC:plasma membrane;CC:chloroplast envelope;CC:central vacuole;CC:plant-type cell wall;CC:plasmodesma;CC:chloroplast;…	1442.37	2097.38	893.851	1060.87	2.34645	1.61366	1.18686
AT5G35630	GLN2	GO:0019676; GO:0006807; GO:0009651; GO:0009735; GO:0006542; GO:0046686; GO:0007568;GO:0022626; GO:0048046; GO:0009579; GO:0009941; GO:0009536; GO:0009570; GO:0016020; GO:0005739; GO:0009535; GO:0009507; GO:0000166; GO:0005524; GO:0003824; GO:0016874; GO:0004356;	BP:ammonia assimilation cycle;BP:nitrogen compound metabolic process;BP:response to salt stress;BP:response to cytokinin;BP:glutamine biosynthetic process;BP:response to cadmium ion;BP:aging;CC:cytosolic ribosome;CC:apoplast;CC:thylakoid;CC:chloroplast envelope;CC:plastid;CC:chloroplast stroma;CC:membrane;CC:mitochondrion;CC:chloroplast thylakoid membrane;CC:chloroplast;MF:nucleotide binding;MF:A…	455.206	766.465	327.253	521.697	2.34212	1.39099	1.59417
AT5G65640	BHLH93	GO:0010371; GO:0006355; GO:0006351; GO:0007275; GO:0045487; GO:0005634; GO:0003700; GO:0003677; GO:0046983;	BP:regulation of gibberellin biosynthetic process;BP:regulation of transcription, DNA-templated;BP:transcription, DNA-templated;BP:multicellular organism development;BP:gibberellin catabolic process;CC:nucleus;MF:transcription factor activity, sequence-specific DNA binding;MF:DNA binding;MF:protein dimerization activity;	4.25433	11.329	4.85433	4.843	2.33379	0.876399	0.997665
AT4G17600	LIL3.1	GO:0015979; GO:1902326; GO:0018298; GO:1904966; GO:1904964; GO:0055085; GO:0006355; GO:0009535; GO:0009536; GO:0016021; GO:0016020; GO:0009579; GO:0042651; GO:0009507; GO:0009523;GO:0019899; GO:0042802; GO:0016168; GO:0022891; GO:0003700; GO:0043495; GO:0005515;	BP:photosynthesis;BP:positive regulation of chlorophyll biosynthetic process;BP:protein-chromophore linkage;BP:positive regulation of vitamin E biosynthetic process;BP:positive regulation of phytol biosynthetic process;BP:transmembrane transport;BP:regulation of transcription, DNA-templated;CC:chloroplast thylakoid membrane;CC:plastid;CC:integral component of membrane;CC:membrane;CC:thylakoid;CC:…	32.05	49.368	21.1573	26.4113	2.33338	1.51484	1.24833
AT1G66430		GO:0006633; GO:0005975; GO:0016310; GO:0016051; GO:0046835; GO:0019252; GO:0009536; GO:0009570; GO:0009507; GO:0016773; GO:0008865; GO:0016301; GO:0016740; GO:0000166; GO:0005524;	BP:fatty acid biosynthetic process;BP:carbohydrate metabolic process;BP:phosphorylation;BP:carbohydrate biosynthetic process;BP:carbohydrate phosphorylation;BP:starch biosynthetic process;CC:plastid;CC:chloroplast stroma;CC:chloroplast;MF:phosphotransferase activity, alcohol group as acceptor;MF:fructokinase activity;MF:kinase activity;MF:transferase activity;MF:nucleotide binding;MF:ATP binding;	8.52833	15.8523	6.79767	6.84633	2.33203	1.2546	1.00716
AT5G24314	PTAC7	GO:0009658; GO:0006355; GO:0009416; GO:0006351; GO:0010027; GO:0042793;GO:0009508; GO:0000427; GO:0009536; GO:0009295; GO:0009507; GO:0005515;	BP:chloroplast organization;BP:regulation of transcription, DNA-templated;BP:response to light stimulus;BP:transcription, DNA-templated;BP:thylakoid membrane organization;BP:transcription from plastid promoter;CC:plastid chromosome;CC:plastid-encoded plastid RNA polymerase complex;CC:plastid;CC:nucleoid;CC:chloroplast;MF:protein binding;	32.1317	54.1917	23.274	37.971	2.32842	1.38058	1.63148
AT1G08380	PSAO	GO:0009768; GO:0009767; GO:0015979;GO:0009579; GO:0009535; GO:0009536; GO:0009522; GO:0016021; GO:0016020; GO:0009507; GO:0005515;	BP:photosynthesis, light harvesting in photosystem I;BP:photosynthetic electron transport chain;BP:photosynthesis;CC:thylakoid;CC:chloroplast thylakoid membrane;CC:plastid;CC:photosystem I;CC:integral component of membrane;CC:membrane;CC:chloroplast;MF:protein binding;	2089.41	2743.54	1189.05	1275.59	2.30733	1.7572	1.07278
AT3G48420	CBBY	GO:0008152;GO:0009941; GO:0009536; GO:0009570; GO:0009507; GO:0016787; GO:0046872;	BP:metabolic process;CC:chloroplast envelope;CC:plastid;CC:chloroplast stroma;CC:chloroplast;MF:hydrolase activity;MF:metal ion binding;	22.257	37.056	16.195	16.7753	2.28811	1.37431	1.03583
AT3G15190	RPS20	GO:0006412;GO:0009941; GO:0009536; GO:0005840; GO:0009570; GO:0016020; GO:0030529; GO:0005622; GO:0009507; GO:0019843; GO:0003735; GO:0003723;	BP:translation;CC:chloroplast envelope;CC:plastid;CC:ribosome;CC:chloroplast stroma;CC:membrane;CC:intracellular ribonucleoprotein complex;CC:intracellular;CC:chloroplast;MF:rRNA binding;MF:structural constituent of ribosome;MF:RNA binding;	115.439	165.904	72.6027	92.9943	2.28509	1.59002	1.28087
AT2G06520	PSBX	GO:0015979;GO:0009535; GO:0009523; GO:0016021; GO:0016020; GO:0019904; GO:0005515;	BP:photosynthesis;CC:chloroplast thylakoid membrane;CC:photosystem II;CC:integral component of membrane;CC:membrane;MF:protein domain specific binding;MF:protein binding;	2031.55	2579.85	1129.19	1173.73	2.28469	1.79912	1.03944
AT1G33590		GO:0080167;GO:0005618; GO:0009505; GO:0009507;	BP:response to karrikin;CC:cell wall;CC:plant-type cell wall;CC:chloroplast;	246.158	296.393	129.863	195.049	2.28235	1.89552	1.50196
AT2G18630		GO:0016021; GO:0016020; GO:0005777;	CC:integral component of membrane;CC:membrane;CC:peroxisome;	7.67233	9.545	4.20467	7.904	2.2701	1.82472	1.87982
AT4G28750	PSAE1	GO:0009735; GO:0015979;GO:0009579; GO:0009941; GO:0009535; GO:0009522; GO:0009534; GO:0010287; GO:0016020; GO:0009538; GO:0009536; GO:0009507; GO:0019904;	BP:response to cytokinin;BP:photosynthesis;CC:thylakoid;CC:chloroplast envelope;CC:chloroplast thylakoid membrane;CC:photosystem I;CC:chloroplast thylakoid;CC:plastoglobule;CC:membrane;CC:photosystem I reaction center;CC:plastid;CC:chloroplast;MF:protein domain specific binding;	3102.13	3882.31	1716.47	1847.13	2.2618	1.80727	1.07612
AT1G14290	SBH2	GO:0030148; GO:0006629; GO:0046520; GO:0009640; GO:0055114; GO:0008610; GO:0005794; GO:0005783; GO:0016021; GO:0016020; GO:0005789; GO:0016491; GO:0005506; GO:0042284;	BP:sphingolipid biosynthetic process;BP:lipid metabolic process;BP:sphingoid biosynthetic process;BP:photomorphogenesis;BP:oxidation-reduction process;BP:lipid biosynthetic process;CC:Golgi apparatus;CC:endoplasmic reticulum;CC:integral component of membrane;CC:membrane;CC:endoplasmic reticulum membrane;MF:oxidoreductase activity;MF:iron ion binding;MF:sphingolipid delta-4 desaturase activity;	36.6037	53.7067	23.9117	20.546	2.24604	1.53079	0.859246
AT1G12090	ELP	GO:0000004; GO:0007582;	BP:biological_process;	419.793	513.339	230.21	180.072	2.22987	1.82352	0.78221
AT1G31330	PSAF	GO:0015979;GO:0009579; GO:0009941; GO:0016021; GO:0009535; GO:0009522; GO:0009534; GO:0010287; GO:0016020; GO:0009538; GO:0009536; GO:0009507; GO:0019904;	BP:photosynthesis;CC:thylakoid;CC:chloroplast envelope;CC:integral component of membrane;CC:chloroplast thylakoid membrane;CC:photosystem I;CC:chloroplast thylakoid;CC:plastoglobule;CC:membrane;CC:photosystem I reaction center;CC:plastid;CC:chloroplast;MF:protein domain specific binding;	2920.27	3457	1555.36	1428.66	2.22264	1.87755	0.918539
